# Supplementary material
Source: MDPI journal article supplement (https://www.mdpi.com/2073-4352/7/2/37)
Supplement: s1 [file s1]

# Supplementary Materials: Crystal Structure of the 23S rRNA Fragment Specific to r-Protein L1 and Designed Model of the Ribosomal L1 Stalk from *Haloarcula marismortui*

Azat Gabdulkhakov, Svetlana Tishchenko, Alisa Mikhaylina, Maria Garber, Natalia Nevskaya and Stanislav Nikonov

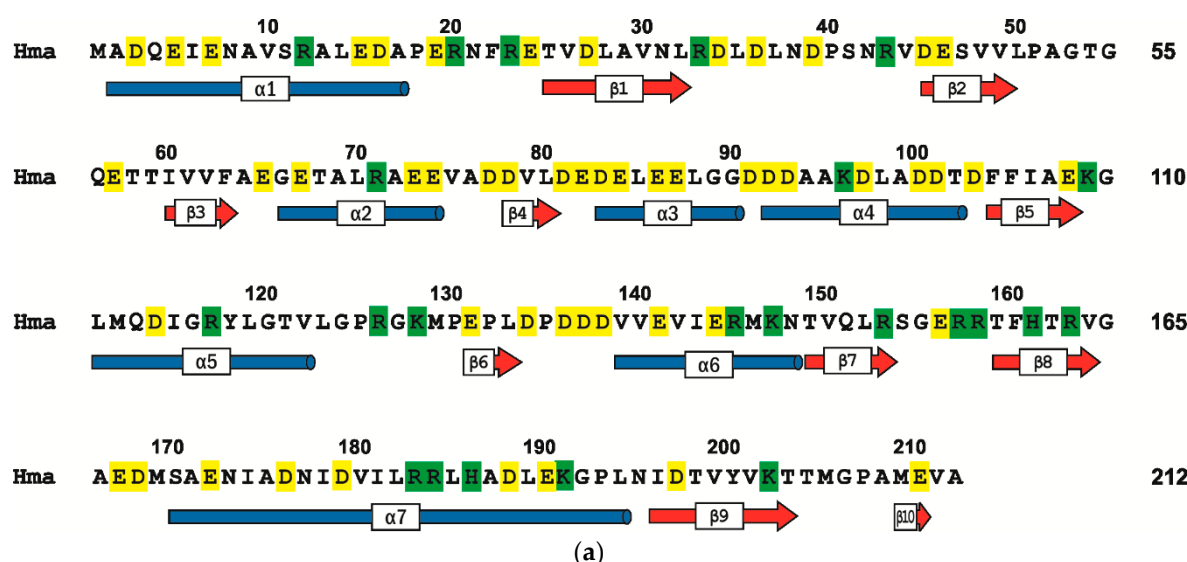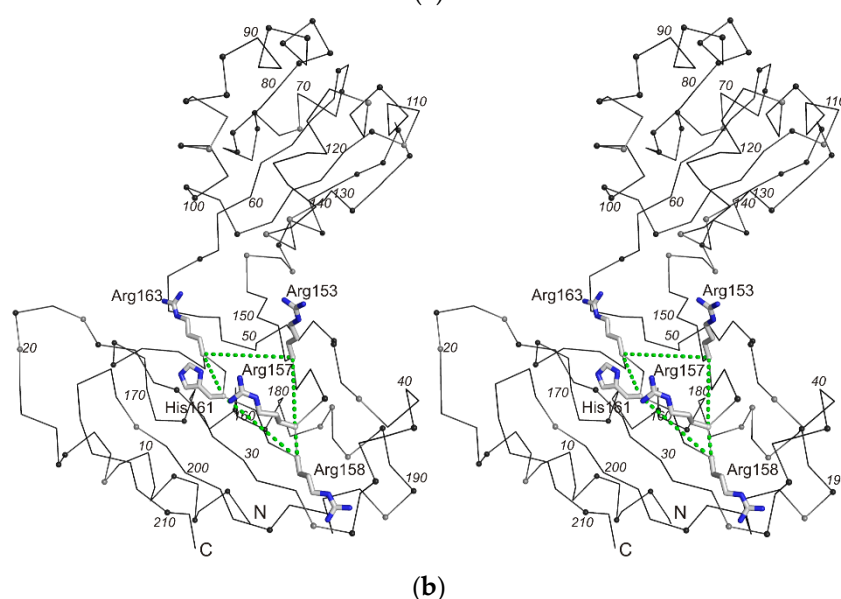

**Figure S1.** (a) HmaL1 amino acid sequence. Negatively charged amino acids are indicated with a yellow background and positively charged with a green one.  $\alpha$ -helices are shown as blue cylinders and  $\beta$ -strands as red arrows; (b) Stereo view of C $\alpha$  trace of HmaL1 model. C $\alpha$  atoms of charged amino acids are shown with circles (black for negative charge, grey for positive one). HmaL1 positively charged cluster unique among L1 proteins is indicated by side chains.
